# Supplementary material
Source: Springer Nature journal article supplement (https://www.springermedizin.de/resource/supplementary/13643_2012_61_MOESM7_ESM.pdf/9681504)

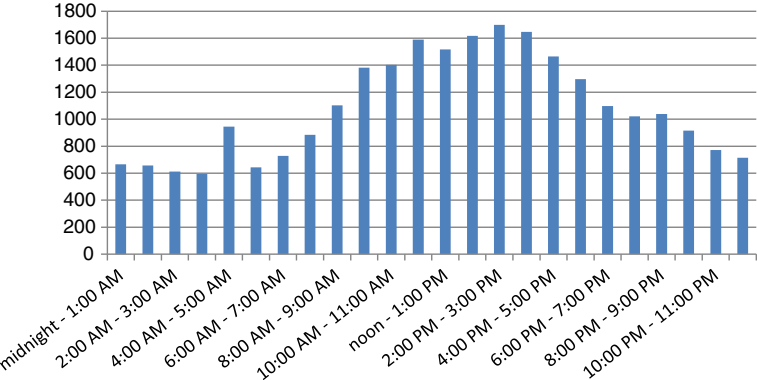

Supplement: MOESM7 [file 9681504]
